# Supplementary material for: Bovine Milk Oligosaccharides with Sialyllactose Improves Cognition in Preterm Pigs
Source: PubMed Central journal article supplement (PMC6628371; doi:10.3390/nu11061335), 2019-06-14
Supplement: nutrients-11-01335-s001.pdf [file nutrients-11-01335-s001.pdf]

## Supplementary Materials

**Supplementary table 1.** Transcript IDs, primer sequences and amplicon lengths of qPCR analyzed genes in hippocampal tissue.

| Gene symbol | Gene name                                                        | Sequence (5' to 3')      | Sequence (5' to 3')       | Amplicon length |
|-------------|------------------------------------------------------------------|--------------------------|---------------------------|-----------------|
| ACTB        | Actin beta                                                       | F: CTACGTCGCCCTGGACTTC   | R: GCAGCTCGTAGCTCTTCTCC   | 76              |
| B3GALT4     | UDP-Gal:BetaGlcNAc Beta 1,3-Galactosyltransferase, polypeptide 4 | F: CTGAACTGGGCTGACAAACA  | R: CTGGGACATTGACAAACACG   | 79              |
| B4GALNT1    | Beta-1,4-N-Acetyl-Galactosaminyl Transferase 1                   | F: CAGGGAGCCCAGTACAACAT  | R: GCCGATTGTAACGAAGGAAG   | 70              |
| B2M         | Beta-2-Microglobulin                                             | F: TGAAGCACGTGACTCTCGAT  | R: CTCTGTGATGCCGGTTAGTG   | 70              |
| BDNF (1)    | Brain Derived Neurotrophic Factor                                | F: CCTTTGGAGCCTCCTCTTCT  | R: CCTCATGGACATGTTTGCAG   | 75              |
| BDNF (2)    | Brain Derived Neurotrophic Factor                                | F: TTGAACACGTGATCGAGGAG  | R: TCCGCGTCCTTATTGTTTC    | 76              |
| CAMK2A (1)  | Calcium/Calmodulin-Dependent Protein Kinase II Alpha             | F: ACAGACAGGAGACCGTGGAC  | R: AGCATGGTGGTGAGGATAGC   | 79              |
| CAMK2A (2)  | Calcium/Calmodulin-Dependent Protein Kinase II Alpha             | F: AGCTATCCTCACCACCATGC  | R: CGCCGTCATTCTTCTTGTTT   | 77              |
| CAMK2B (1)  | Calcium/Calmodulin-Dependent Protein Kinase II Beta              | F: CCCAGACGAATAGCACCAAA  | R: GGGTTATGAATGACGGTGGT   | 100             |
| CAMK2B (2)  | Calcium/Calmodulin-Dependent Protein Kinase II Beta              | F: GGCAATCTGGTTGAAGGAAT  | R: GTTCAGGATGGTTGTGTGGA   | 93              |
| CAMK2G (1)  | Calcium/Calmodulin-Dependent Protein Kinase II Gamma             | F: TCACCTCCTTGAGCCTGAG   | R: GGGCTTGCTGTTCTTGATA    | 98              |
| CAMK2G (2)  | Calcium/Calmodulin-Dependent Protein Kinase II Gamma             | F: GGACTTTGAGGCCTACACGA  | R: CTTCCACCAGGTTACCAAGG   | 80              |
| CREB1 (1)   | cAMP Responsive Element Binding Protein 1                        | F: GGCTGCAGACATTAACCAT   | R: TCTGCTGTCCATCAGTGGTC   | 91              |
| CREB1 (2)   | cAMP Responsive Element Binding Protein 1                        | F: ACTGTAACGGTGCCAACTCC  | R:ATTGCTCCTCCCTGGGTAAT    | 74              |
| DCX         | Doublecortin                                                     | F: CCTCAGGGAGTGCGTTACAT  | R: ATAGCTTTCCCCTTCCTCCA   | 84              |
| DLG4 (1)    | Discs, Large homolog 4                                           | F: AGAAGGACATCCAGGCACAC  | R: ACTGGACGCTGGTTCCATAC   | 75              |
| DLG4 (2)    | Discs, Large homolog 4                                           | F: TCCTATCGCCATCTTCATCC  | R: GCTCCTCTGTGATCCGCTTA   | 74              |
| FGF2 (1)    | Fibroblast Growth Factor 2                                       | F: CGGTCGAGGAAATACTCCAG  | R: TCCTGTTTTGGGTCCAAGTT   | 75              |
| FGF2 (2)    | Fibroblast Growth Factor 2                                       | F: AAGCAGAAGAGAGGGGTTG   | R: GCCAGTAATCTTCATCTTCCTT | 85              |
| GAP43       | Growth Associated Protein 43                                     | F: AAAGCTTCCACTGACAACTCG | R: GGCTTGTTTAGGCTCCTCCT   | 72              |

|            |                                                         |                         |                         |     |
|------------|---------------------------------------------------------|-------------------------|-------------------------|-----|
| GAPDH      | Glyceraldehyde-3-phosphate dehydrogenase                | F: ACCCAGAAGACTGTGGATGG | R: AAGCAGGGATGATGTTCTGG | 79  |
| GFAP       | Glial fibrillary acidic protein                         | F: ACATCGAGATCGCCACCTAC | R: GCAGATTGGAGAAGGTCTGC | 84  |
| GRIA1      | Glutamate Ionotropic Receptor AMPA Type Subunit 1       | F: AGGGCAAATACGCCTACCTT | R: CCACCTTCATGGTGTACAG  | 81  |
| GRIA2      | Glutamate Ionotropic Receptor AMPA Type Subunit 2       | F: CCTCGGTGTTTGTGAGGACT | R: GTGGACTCCAGCAAGTAGGC | 85  |
| GRIA3      | Glutamate Ionotropic Receptor AMPA Type Subunit 3       | F: CTGCTGGAGTCAACCATGAA | R: GGAATCCAGATTTCACCAA  | 81  |
| GRIA4 (1)  | Glutamate Ionotropic Receptor AMPA Type Subunit 4       | F: TAGCTCGTGTCGAAAATCC  | R: CATCGTGTACATGGCTTTC  | 95  |
| GRIA4 (2)  | Glutamate Ionotropic Receptor AMPA Type Subunit 4       | F: GGGCAGAAGCAAAGAGAATG | R: TTTTCACCCACACTCCCAGT | 88  |
| GRIN2A (1) | Glutamate Receptor, Ionotropic, N-Methyl D-Aspartate 2A | F: ACGGGCCTTCTTTTACGATT | R: GCTGGTGGTCCCTTTAGGAT | 98  |
| GRIN2A (2) | Glutamate Receptor, Ionotropic, N-Methyl D-Aspartate 2A | F: TGATGCTGCTCATTGTCTCC | R: TGCTTCCCTTTGGCTAAGT  | 92  |
| GRIN2B     | Glutamate Receptor, Ionotropic, N-Methyl D-Aspartate 2B | F: GTCACGCAGAACCCTTTCAT | R: GTGGGCTGCCTGAAGAAGTA | 86  |
| FAIM2      | Fas apoptotic inhibitory molecule 2                     | F: TACAACACCACATCCGTGCT | R: GTCGAACTTGGTCTGGAAGC | 90  |
| MAG (1)    | Myelin Associated Glycoprotein                          | F: TCTTGTGCTCCACACAGAGC | R: ACAGTGGCCAGAATCTGCTT | 73  |
| MAG (2)    | Myelin Associated Glycoprotein                          | F: GTGGAGCTCAGCGTCATGTA | R: CTGTGTGGAGCACAAGATGG | 99  |
| MAP2       | Microtubuli-Associated Protein 2                        | F: AGCCTAAAGGGGGACAGGTA | R: GCGGATGTTCTTCAGAGAG  | 90  |
| MBP        | Myelin Basic Protein                                    | F: TGACTACAAACCGGCTCACA | R: TCCCAGCTTGAAGATTTTGG | 79  |
| MOG        | Myelin oligodendrocyte glycoprotein                     | F: CGAGCAGAGATCGAGAACCT | R: AACTGGCACGATCACAAACA | 93  |
| NCAM1      | Neural Cell Adhesion Molecule 1                         | F: GTGCAGTTTGATGAGCCAGA | R: ACCACTTGGAGTGCCAGACT | 100 |
| NCAM2 (1)  | Neural Cell Adhesion Molecule 2                         | F: AGGGTTGCAGCTGTAAATGG | R: CACTGCTAGGCTGTCCATGA | 115 |
| NCAM2 (2)  | Neural Cell Adhesion Molecule 2                         | F: AGCCAAGTTCCTTTCAGCA  | R: CCACCTCTTTGACGTCCACT | 80  |
| NCS1 (1)   | Neuronal Calcium Sensor 1                               | F: TGTGGATGCCATTTACCAGA | R: GTCCATCATGGCAAAGATCC | 100 |
| NCS1 (2)   | Neuronal Calcium Sensor 1                               | F: TAACGACGGCTACATCACCA | R: GTTGCCACCATCTGGTAAA  | 70  |
| NEFL       | Neurofilament light chain                               | F: AGAACGCCGACATTAGTGCT | R: TGCCATTTCACTCTTTGTGG | 80  |
| NEFM       | Neurofilament medium chain                              | F: AGGAGAAGCCACAGCAGAAG | R: TTCCTTCAAACCTCCCTCCT | 71  |
| NEFH       | Neurofilament heavy chain                               | F: CAGGACCTGCTCAATGTCAA | R: CGAAGCCAATTCGACACTCT | 91  |
| NEU1       | Neuraminidase 1                                         | F: CCGGAACCAGAACAACTACC | R: GGGGTCAAAGGTCACATCAC | 97  |
| NTRK2 (1)  | Neurotrophic Receptor Tyrosine Kinase 2                 | F: TTGTGTGGCAGAAAATCTCG | R: GGTCTGAGGTTGGAGATTCG | 101 |

|              |                                                              |                          |                           |     |
|--------------|--------------------------------------------------------------|--------------------------|---------------------------|-----|
| NTRK2 (2)    | Neurotrophic Receptor Tyrosine Kinase 2                      | F: GGGGCAATTTTGAATGAGTC  | R: CGTGGTACTCCGTGTGATTG   | 70  |
| NTF3         | Neurotrophin 3                                               | F: AGACTCGCTCAATTCCTGA   | R: CTGAAGGTCCACCATCTGCT   | 85  |
| OCLN         | Occludin                                                     | F:GACGAGCTGGAGGAAGACTG   | R: GTACTCCTGCAGGCCACTGT   | 102 |
| PLP1         | Proteolipid Protein 1                                        | F: TTGCCAGTCTATTGCCTTC   | R: GAAAGCATTCCATGGGAGAA   | 97  |
| PPIA         | Peptidylprolyl isomerase A (cyclophilin A)                   | F: CAAGACTGAGTGGTTGGATGG | R: TGTCCACAGTCAGCAATGGT   | 138 |
| RPL13A       | Ribosomal protein L13a                                       | F: ATTGTGGCCAAGCAGTACT   | R: AATTGCCAGAAATGTTGATGC  | 76  |
| SLC17A5 (1)  | Solute Carrier Family 17 member 5                            | F: CTATTCCTGGCTGTTGCAT   | R: CAATGTCCAGATGGCTGATG   | 89  |
| SLC17A5 (2)  | Solute Carrier Family 17 member 5                            | F: ACCCCTGAGAACACGATCAG  | R: TGTGAAGAAAATGGCACCAA   | 84  |
| SLC2A3/GLUT3 | Solute Carrier Family 2 Member 3                             | F: TCCCCTCAGCTGCATTCTAT  | R: CCAGAAGACAACGAGGAAGC   | 71  |
| ST3GAL3      | ST3 Beta-Galactoside Alpha-2,3-Sialyltransferase 2           | F: CTCTGGGGTACGAATTGAT   | R: ACGTCCTTCTCGAAGCCTTT   | 79  |
| ST3GAL5 (1)  | ST3 Beta-Galactoside Alpha-2,3-Sialyltransferase 5           | F: GCACCACTGTCTGACCTTGA  | R: GCCTGAAGCCAGTTGAAGTC   | 86  |
| ST3GAL5 (2)  | ST3 Beta-Galactoside Alpha-2,3-Sialyltransferase 5           | F: AACCAGTTCGACGTGGTGAT  | R: CCCCCTCTGGGTAAGTCATC   | 103 |
| ST8SIA1 (1)  | ST8 Alpha-N-Acetyl-Neuraminide Alpha-2,8-Sialyltransferase 1 | F: TTTGTCATGCGATGCAATCT  | R: ACCTTTGCCGAATTATGCTG   | 106 |
| ST8SIA1 (2)  | ST8 Alpha-N-Acetyl-Neuraminide Alpha-2,8-Sialyltransferase 1 | F:GCTGTGGCCGTCAAATAGAT   | R:AGCCGTCACCAAATGACTTT    | 110 |
| SYNPO        | Synaptopodin                                                 | F: CAGAGGCAGATGTCAACCAA  | R: GTTGTGGTGGCCGTTAGAAG   | 77  |
| SYP          | Synaptophysin                                                | F: GTGACCTCTGGCCTCAACAC  | R: CTCCTTGAACACGAACCACA   | 87  |
| TBP          | TATA box binding protein                                     | F: ACGTTCGGTTTAGGTTGCAG  | R: CAGGAACGCTCTGGAGTTCT   | 96  |
| TGFB2        | Transforming Growth Factor Beta 2                            | F: GACCCACATCTCCTGCTAA   | R: ATAGGCTGCATCCAAAGCAC   | 94  |
| UGCG (1)     | UDP-Glucose Ceramide Glucosyltransferase                     | F: GCTGCCGTATGTAGCAGACA  | R: CCTTGGATGAGAGGTTCCAA   | 76  |
| UGCG (2)     | UDP-Glucose Ceramide Glucosyltransferase                     | F: AGAATGCTTCGTTGCCAGTT  | R: TATAAACCACGCCAGGCAAT   | 103 |
| VEGFA        | Vascular Endothelial Growth Factor A                         | F: GAGGCAAGAAAATCCCTGTGG | R: GCAGGAACATTTACACGTCTGC | 85  |
